# Supplementary material
Source: PubMed Central journal article supplement (PMC3226369)
Supplement: supp_111.184416_Supplement_iNOS.pdf [file supp_111.184416_Supplement_iNOS.pdf]

## ESTROGEN INCREASES NITRIC OXIDE PRODUCTION IN HUMAN BRONCHIAL EPITHELIUM

Elizabeth A. Townsend, Lucas W. Meuchel, Michael A. Thompson, Christina M. Pabelick, and Y S Prakash

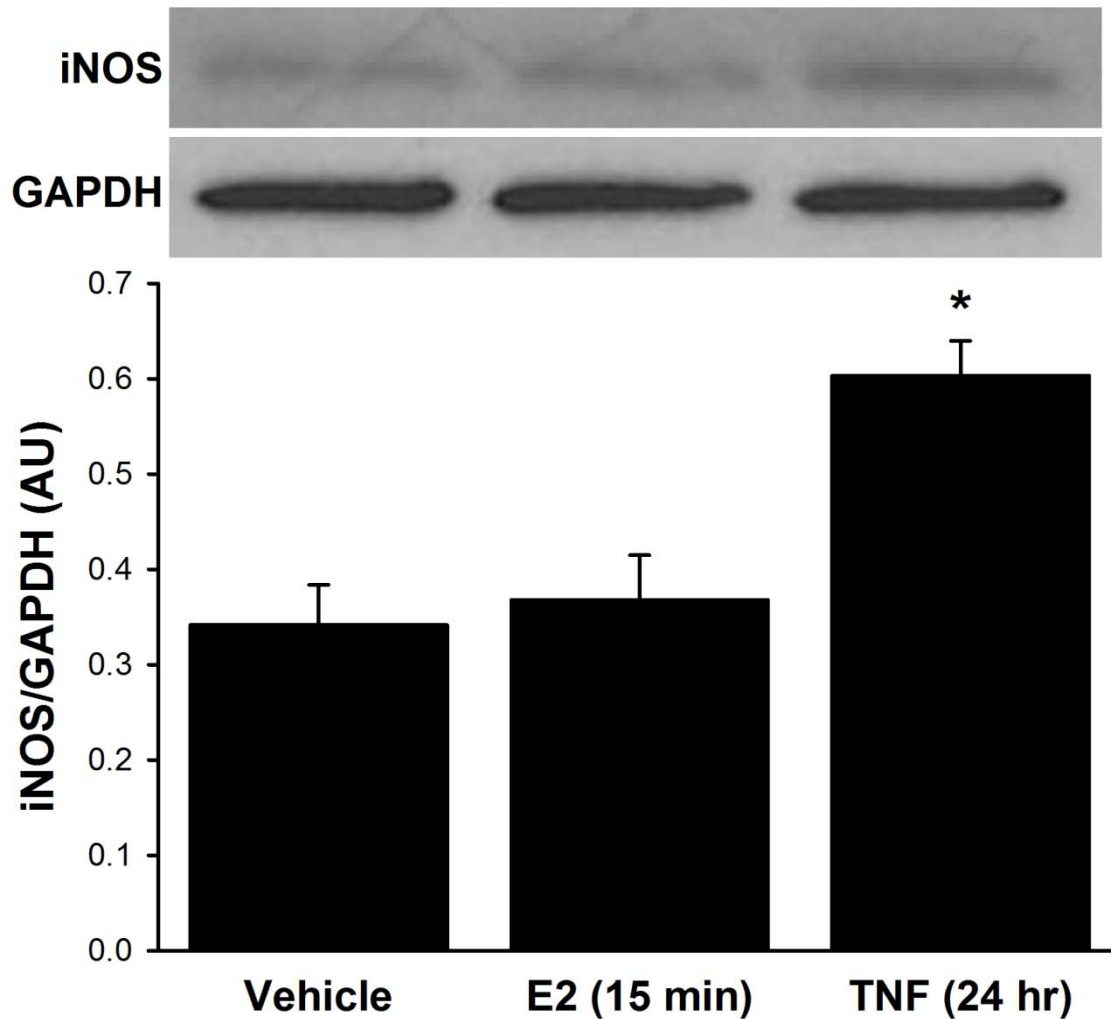

**Supplemental Figure 1: iNOS is minimally expressed under basal conditions in BECs.** In BECs grown in standard BEGM media, Western analyses showed low expression of iNOS. Treatment of BECs for 15 minutes with 10 nM E<sub>2</sub> (to simulate NO-imaging studies) did not increase iNOS expression. Overnight treatment with the inflammatory cytokine, TNF $\alpha$  (20 ng/ml), substantially increased iNOS expression in BECs. Values are mean densities  $\pm$  SE (n=4 patients) \* indicates significant difference from vehicle control (p<0.05).
